# Supplementary material for: Aryl C–O oxidative addition of phenol derivatives to nickel supported by an N-heterocyclic carbene via a Ni0 five-centered complex
Source: Royal Society of Chemistry journal article supplement (doi:10.1039/c9dt00455f), 2019-01-01
Supplement: c9dt00455f1.pdf [file c9dt00455f1.pdf]

## Supplementary Information

### Aryl C-O Oxidative Addition of Phenol Derivatives to Nickel Supported by an N- Heterocyclic Carbene via a Ni<sup>0</sup> Five-Centered Complex

*Chayapat Uthayopas<sup>a</sup> and Panida Surawatanawong<sup>\*a,b</sup>*

<sup>a</sup>Department of Chemistry and Center of Excellence for Innovation in Chemistry,

Faculty of Science, Mahidol University, Bangkok 10400, Thailand.

<sup>b</sup>Center of Sustainable Energy and Green Materials, Mahidol University, Salaya, Nakhon  
Pathom 73170, Thailand

**Table S1** Relative free energies (in kcal/mol) with respect to NiL<sub>2</sub> (L = SIPr) for aryl C-O

|                                                                      | <b>IN1_3</b> | <b>TS_3</b> |
|----------------------------------------------------------------------|--------------|-------------|
| B3LYP/BS1                                                            | 9.6          | 28.4        |
| CPCM-B3LYP/BS1                                                       | 8.9          | 27.0        |
| CPCM-M06/BS2//B3LYP/BS1                                              | 8.1          | 37.1        |
| CPCM-M06/BS2//CPCM-B3LYP/BS1                                         | 7.7          | 36.2        |
| wB97XD/BS1                                                           | 18.9         | 45.1        |
| M06L/BS1                                                             | 14.9         | 41.7        |
| oxidative addition of Naph-OMe via three-centered transition states. |              |             |

**Table S2** Relative free energies (in kcal/mol) with respect to NiL<sub>2</sub> (L = SIPr) for aryl C-O

|                                                                                                                                        | <b>IN1_3 LA</b> | <b>TS_3 LA</b> | <b>IN1_5 LA</b> | <b>TS_5 LA</b> |
|----------------------------------------------------------------------------------------------------------------------------------------|-----------------|----------------|-----------------|----------------|
| B3LYP/BS1                                                                                                                              | -3.7            | 20.6           | 1.6             | 15.4           |
| CPCM-B3LYP/BS1                                                                                                                         | -4.3            | 20.2           | 2.2             | 14.9           |
| CPCM-M06/BS2//B3LYP/BS1                                                                                                                | 2.1             | 31.1           | 12.2            | 30.9           |
| CPCM-M06/BS2//CPCM-B3LYP/BS1                                                                                                           | 1.8             | 31.8           | 11.1            | 30.6           |
| wB97XD/BS1                                                                                                                             | -7.4            | 20.3           | -5.4            | 16.9           |
| M06L/BS1                                                                                                                               | -4.1            | 17.4           | -4.0            | 16.7           |
| oxidative addition of Naph-OMe with assistance of Lewis acid (LA = AlMe <sub>3</sub> ) via three- and five-centered transition states. |                 |                |                 |                |

### Distortion-interaction analysis

The distortion-interaction model<sup>1-7</sup> can be used to provide insights into the difference in the energy barriers. The transition state **TS\_3** (or **TS\_5**) structure, which is obtained from gas-phase optimization using B3LYP/BS1, was separated into two distorted fragments: Ni-SIPr catalyst and ArOR<sup>1</sup> substrate. The single-point energy calculations using M06/BS2 in gas-phase were performed on these two fragments. The distortion energy was calculated from the difference between the electronic energies of the distorted fragment structure and the optimized structure of the Ni-SIPr catalyst ( $\Delta E_{\text{dist-cat}}$ ) or the ArOR<sup>1</sup> substrate ( $\Delta E_{\text{dist-sub}}$ ). While the relative energy ( $\Delta E_{\text{rel}}$ ) is the electronic energy of the transition state relative to that of the optimized Ni-SIPr and ArOR<sup>1</sup> fragments, the interaction energy ( $\Delta E_{\text{int}}$ ) was calculated from

the difference between the relative energy ( $\Delta E_{rel}$ ) and the total distortion energy ( $\Delta E_{dist-cat} + \Delta E_{dist-sub}$ ).

**Table S3** Distortion/interaction decomposition analysis, NBO charge (q), and C<sub>Ar</sub>-O bond distance of **TS\_3** for aryl C-O OA of ArOX.

| Ar-OX                                    | distortion/interaction analysis<br>(kcal/mol) |                       |                       |                  | NBO charge      |                 |                 | C <sub>Ar</sub> -O bond<br>distance (Å) |                   |
|------------------------------------------|-----------------------------------------------|-----------------------|-----------------------|------------------|-----------------|-----------------|-----------------|-----------------------------------------|-------------------|
|                                          | $\Delta E_{rel}$                              | $\Delta E_{dist-cat}$ | $\Delta E_{dist-sub}$ | $\Delta E_{int}$ | q <sub>Ni</sub> | q <sub>Ar</sub> | q <sub>OX</sub> | TS                                      | free<br>substrate |
| <b>Ar-OR<sup>1</sup></b>                 |                                               |                       |                       |                  |                 |                 |                 |                                         |                   |
| Ph-OMe                                   | -8.3                                          | 3.7                   | 42.2                  | -54.2            | 0.286           | -0.084          | -0.331          | 1.673                                   | 1.368             |
| Naph-OMe                                 | -11.6                                         | 3.9                   | 41.8                  | -57.3            | 0.302           | -0.117          | -0.328          | 1.675                                   | 1.369             |
| Ph-OPh                                   | -13.1                                         | 3.9                   | 29.5                  | -46.5            | 0.237           | -0.002          | -0.356          | 1.610                                   | 1.383             |
| <b>Ph-OC(O)R<sup>2</sup></b>             |                                               |                       |                       |                  |                 |                 |                 |                                         |                   |
| Ph-OC(O)NEt <sub>2</sub>                 | -13.3                                         | 2.9                   | 22.4                  | -38.6            | 0.188           | 0.070           | -0.360          | 1.565                                   | 1.394             |
| Ph-OC(O)NH <sub>2</sub>                  | -11.3                                         | 2.8                   | 22.2                  | -36.3            | 0.183           | 0.082           | -0.369          | 1.569                                   | 1.397             |
| Ph-OC(O) <sup>i</sup> Bu                 | -13.3                                         | 3.2                   | 21.4                  | -37.8            | 0.183           | 0.086           | -0.375          | 1.566                                   | 1.399             |
| Ph-OC(O)Me                               | -11.7                                         | 2.9                   | 23.4                  | -38.0            | 0.195           | 0.078           | -0.383          | 1.590                                   | 1.401             |
| Ph-OC(O)Ph                               | -12.5                                         | 3.0                   | 22.1                  | -37.5            | 0.195           | 0.095           | -0.399          | 1.572                                   | 1.399             |
| <b>Ph-OS(O)<sub>2</sub>R<sup>3</sup></b> |                                               |                       |                       |                  |                 |                 |                 |                                         |                   |
| Ph-OS(O) <sub>2</sub> NMe <sub>2</sub>   | -18.4                                         | 3.6                   | 23.0                  | -45.0            | 0.200           | 0.081           | -0.394          | 1.586                                   | 1.405             |
| Ph-OS(O) <sub>2</sub> Me                 | -16.3                                         | 3.1                   | 20.8                  | -40.1            | 0.180           | 0.091           | -0.393          | 1.572                                   | 1.407             |
| Ph-OS(O) <sub>2</sub> ( <i>p</i> -Tol)   | -16.7                                         | 3.1                   | 21.1                  | -40.9            | 0.196           | 0.083           | -0.395          | 1.567                                   | 1.405             |
| Ph-OS(O) <sub>2</sub> CF <sub>3</sub>    | -17.1                                         | 2.5                   | 13.8                  | -33.5            | 0.127           | 0.158           | -0.411          | 1.524                                   | 1.417             |

**Table S4** Distortion/interaction decomposition analysis, NBO charge (q), and C<sub>Ar</sub>-O bond distance of **TS\_5** for aryl C-O OA of PhOX.

| Ar-OX                                    | distortion/interaction analysis<br>(kcal/mol) |                       |                       |                  | NBO charge      |                 |                 | C <sub>Ar</sub> -O bond<br>distance (Å) |                   |
|------------------------------------------|-----------------------------------------------|-----------------------|-----------------------|------------------|-----------------|-----------------|-----------------|-----------------------------------------|-------------------|
|                                          | $\Delta E_{rel}$                              | $\Delta E_{dist-cat}$ | $\Delta E_{dist-sub}$ | $\Delta E_{int}$ | q <sub>Ni</sub> | q <sub>Ar</sub> | q <sub>OX</sub> | TS                                      | free<br>substrate |
| <b>Ph-OC(O)R<sup>2</sup></b>             |                                               |                       |                       |                  |                 |                 |                 |                                         |                   |
| Ph-OC(O) <sup>i</sup> Bu                 | -21.4                                         | 8.3                   | 58.2                  | -87.9            | 0.571           | -0.160          | -0.490          | 1.870                                   | 1.399             |
| Ph-OC(O)Me                               | -21.2                                         | 7.6                   | 56.8                  | -85.7            | 0.569           | -0.160          | -0.488          | 1.862                                   | 1.401             |
| Ph-OC(O)Ph                               | -22.3                                         | 7.8                   | 55.6                  | -85.7            | 0.560           | -0.159          | -0.493          | 1.839                                   | 1.399             |
| <b>Ph-OS(O)<sub>2</sub>R<sup>3</sup></b> |                                               |                       |                       |                  |                 |                 |                 |                                         |                   |
| Ph-OS(O) <sub>2</sub> Me                 | -21.9                                         | 9.1                   | 50.7                  | -81.7            | 0.538           | -0.113          | -0.516          | 1.767                                   | 1.407             |
| Ph-OS(O) <sub>2</sub> ( <i>p</i> -Tol)   | -25.1                                         | 8.2                   | 52.5                  | -85.8            | 0.547           | -0.112          | -0.537          | 1.793                                   | 1.405             |
| Ph-OS(O) <sub>2</sub> CF <sub>3</sub>    | -28.8                                         | 8.9                   | 38.1                  | -75.8            | 0.490           | -0.081          | -0.508          | 1.700                                   | 1.417             |

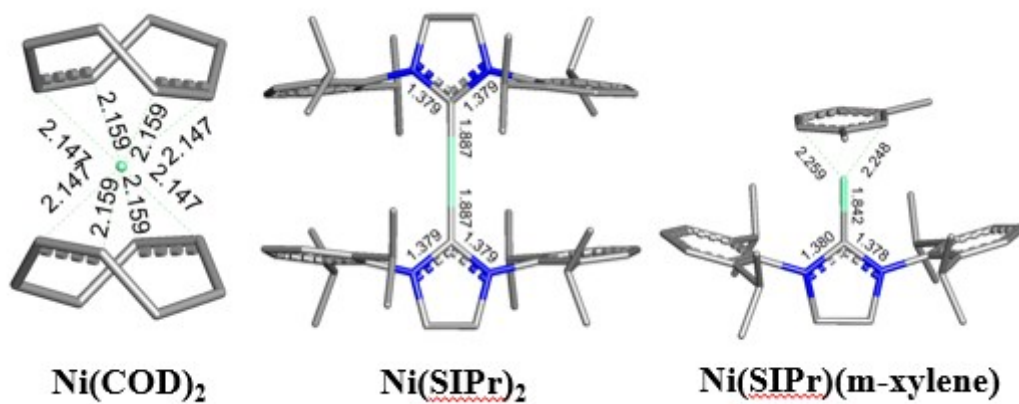

**Fig. S1** Optimized structures of Ni(COD)<sub>2</sub>, Ni(SIPr)<sub>2</sub>, and Ni(SIPr)(*m*-xylene). Hydrogen atoms are omitted for clarity. Bond distances are shown in Å.

(a)

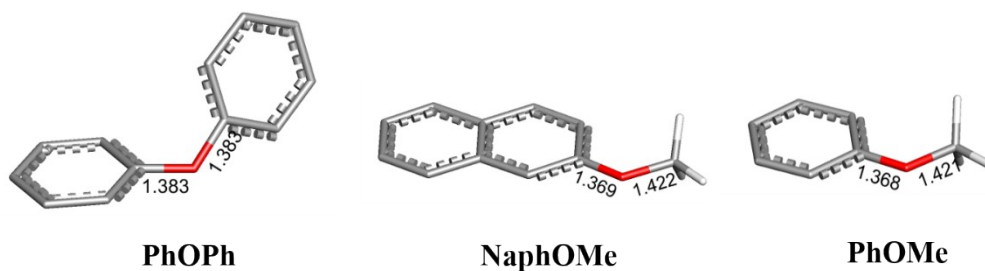

(b)

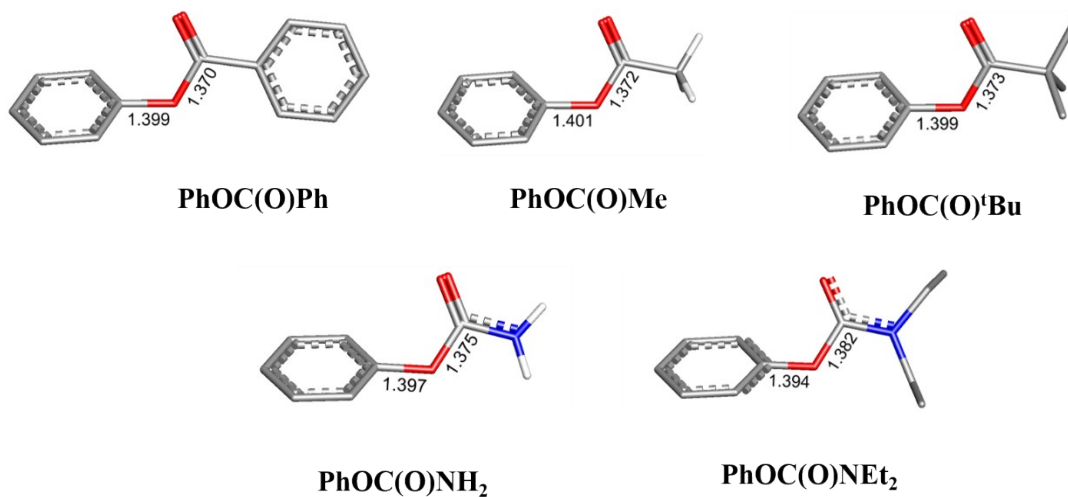

(c)

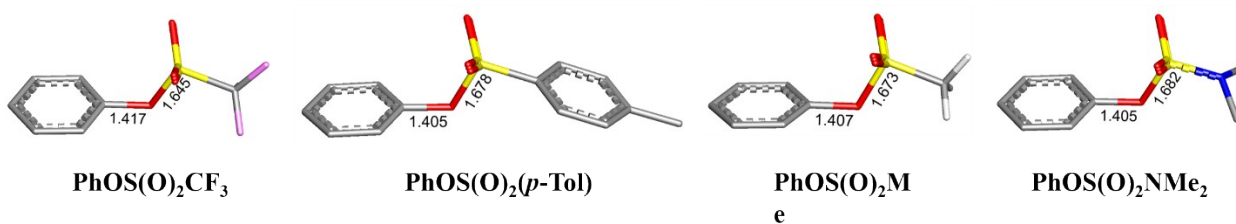

**Fig. S2** Optimized structures of (a) aryl ethers, ArOR<sup>1</sup>: PhOPh, NaphOMe, and PhOMe, (b) phenyl esters/carbamates: PhOC(O)R<sup>2</sup> (R<sup>2</sup> = Ph, Me, <sup>t</sup>Bu, NH<sub>2</sub>, and NEt<sub>2</sub>), and (c) phenyl sulfonates/sulfamate: PhOS(O)<sub>2</sub>R<sup>3</sup> (R<sup>3</sup> = CF<sub>3</sub>, *p*-Tol, Me, and NMe<sub>2</sub>). Hydrogen atoms are omitted for clarity except for those on OMe and NH<sub>2</sub>. Bond distances are shown in Å.

### PhOMe

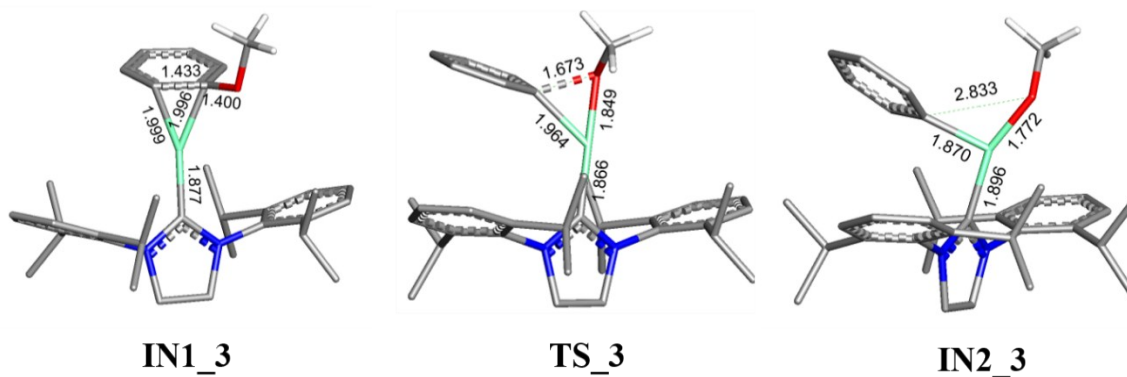

### NaphOMe

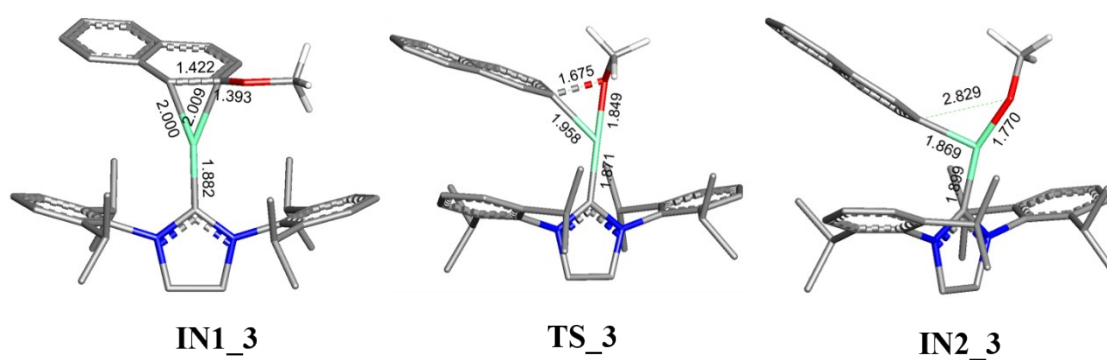

### PhOPh

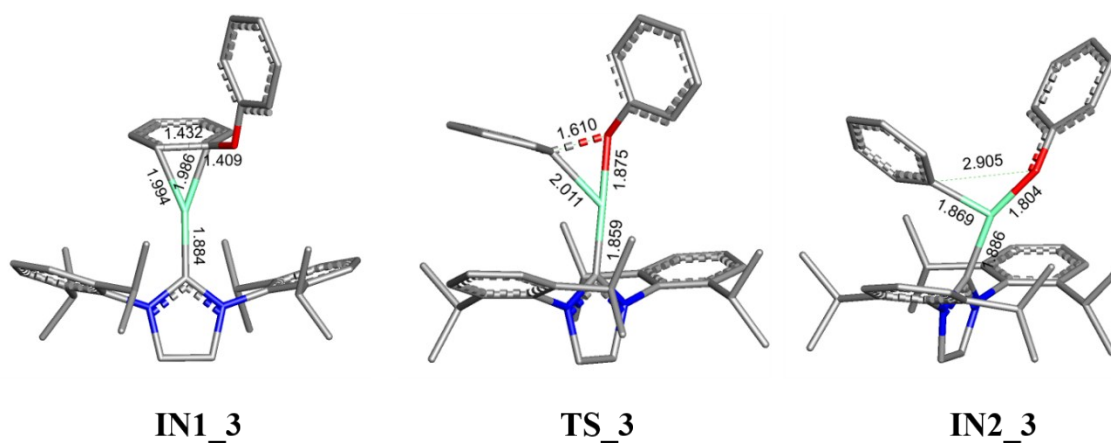

**Fig. S3** Optimized structures of IN1\_3, TS\_3, and IN2\_3 for aryl C-O oxidative addition of aryl ethers, ArOR<sup>1</sup>: PhOMe, NaphOMe, and PhOPh. Hydrogen atoms are omitted for clarity except for those on OMe. Bond distances are shown in Å.

**PhOC(O)NEt<sub>2</sub>**

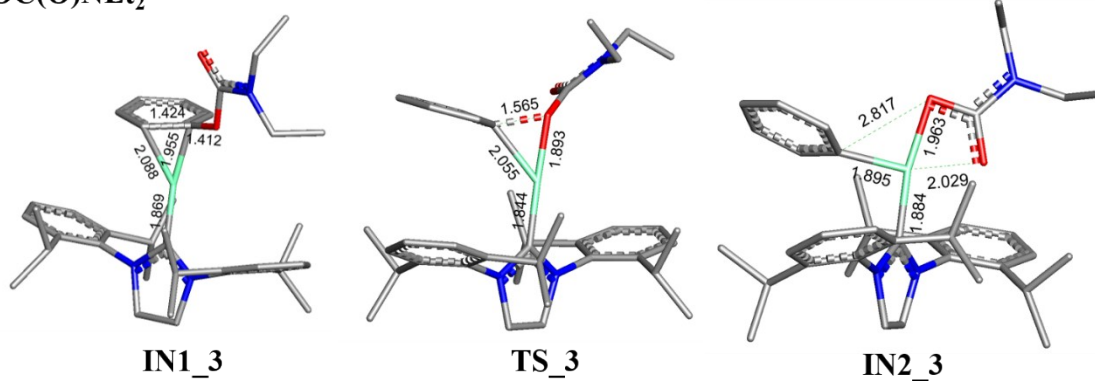

**PhOC(O)NH<sub>2</sub>**

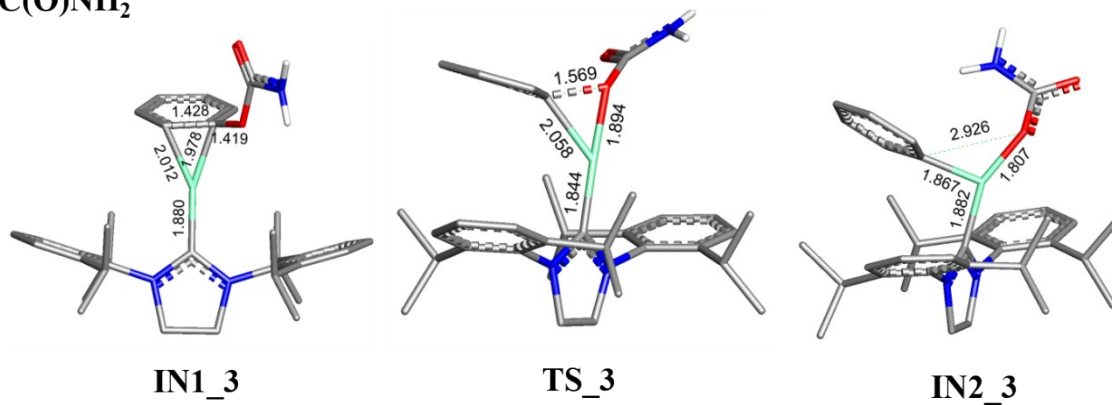

**Fig. S4** Optimized structures of IN1\_3, TS\_3, and IN2\_3 for aryl C-O oxidative addition of phenyl carbamates: PhOC(O)R<sup>2</sup> (R<sup>2</sup> = NEt<sub>2</sub>, and NH<sub>2</sub>). Hydrogen atoms are omitted for clarity except for those on NH<sub>2</sub>. Bond distances are shown in Å.

**PhOC(O)<sup>t</sup>Bu**

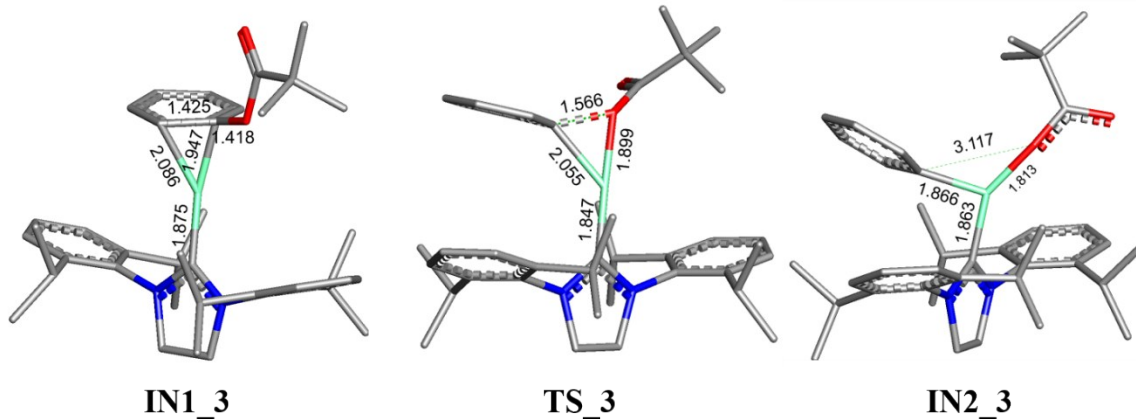

**PhOC(O)Me**

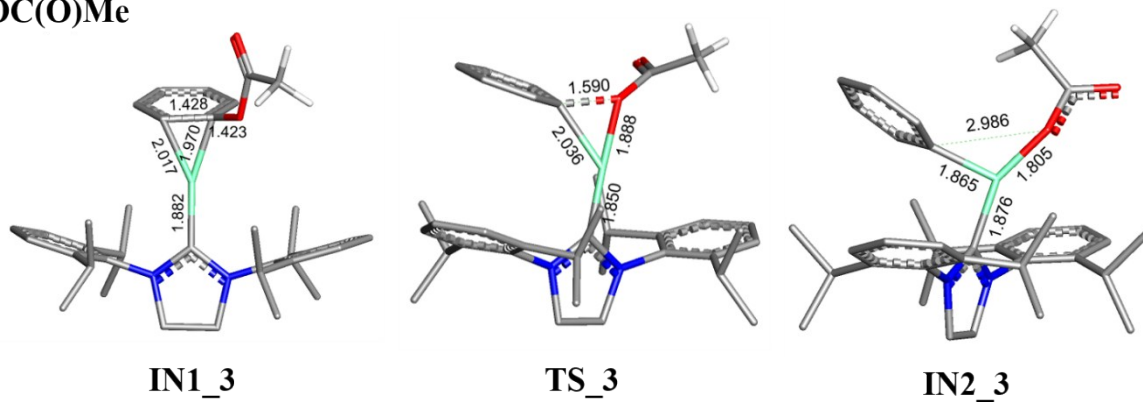

**PhOC(O)Ph**

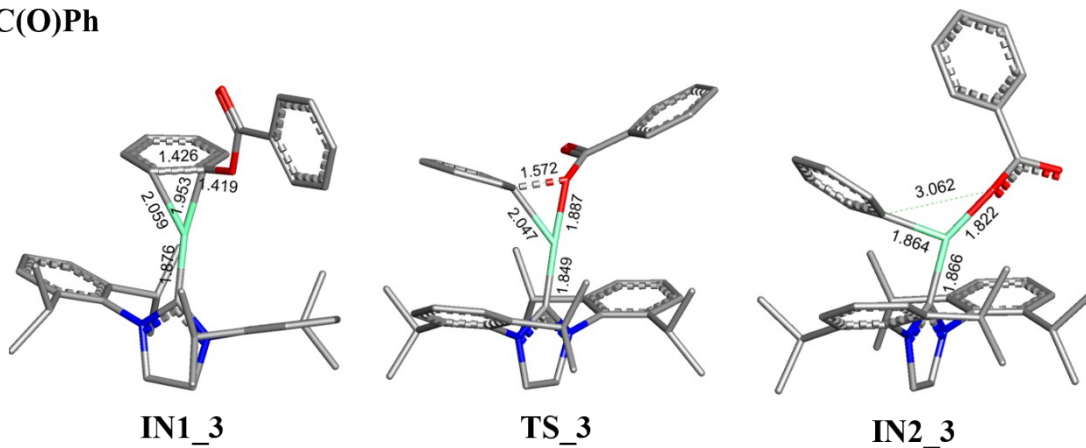

**Fig. S5** Optimized structures of IN1\_3, TS\_3, and IN2\_3 for aryl C-O oxidative addition of phenyl esters: PhOC(O)R<sup>2</sup> (R<sup>2</sup> = <sup>t</sup>Bu, Me, and Ph). Hydrogen atoms are omitted for clarity except for those on OMe and NH<sub>2</sub>. Bond distances are shown in Å.



PhOS(O)<sub>2</sub>NMe<sub>2</sub>

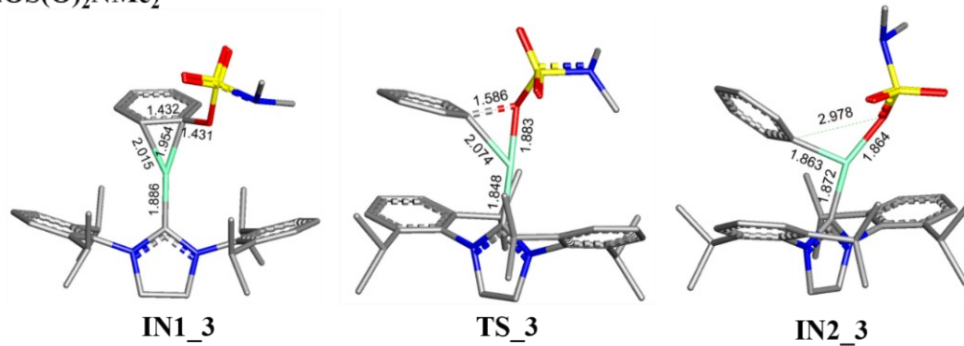

PhOS(O)<sub>2</sub>Me

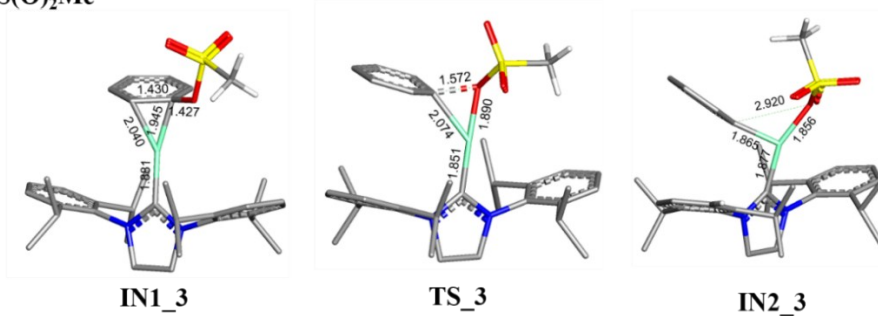

PhOS(O)<sub>2</sub>(*p*-Tol)

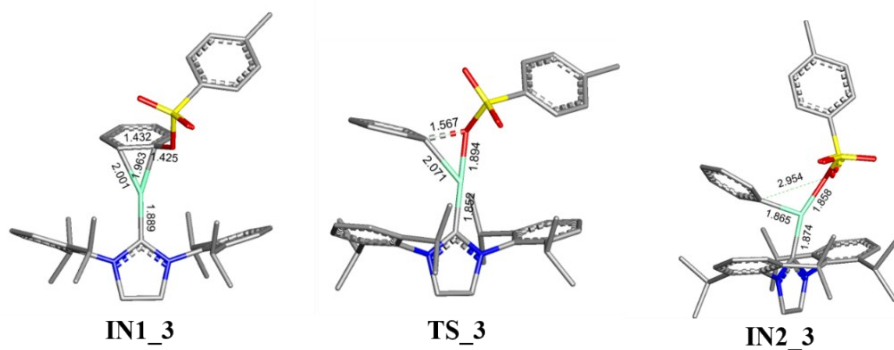

PhOS(O)<sub>2</sub>CF<sub>3</sub>

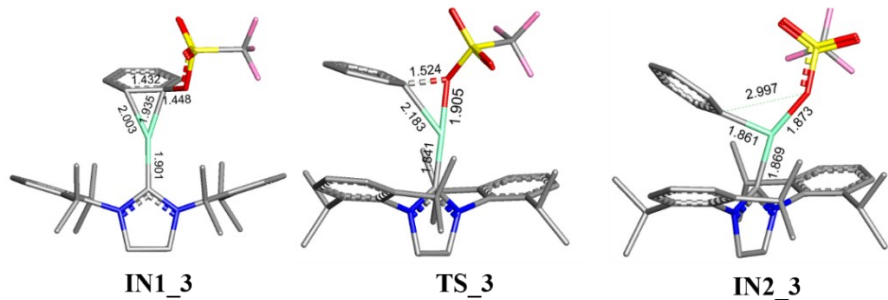

**Fig. S6** Optimized structures of IN1\_3, TS\_3, and IN2\_3 for aryl C-O oxidative addition of phenyl sulfonates/sulfamate: PhOS(O)<sub>2</sub>R<sup>3</sup> (R<sup>3</sup> = NMe<sub>2</sub>, Me, *p*-Tol, and CF<sub>3</sub>). Hydrogen atoms are omitted for clarity except for those on Me of PhOS(O)<sub>2</sub>Me. Bond distances are shown in Å.

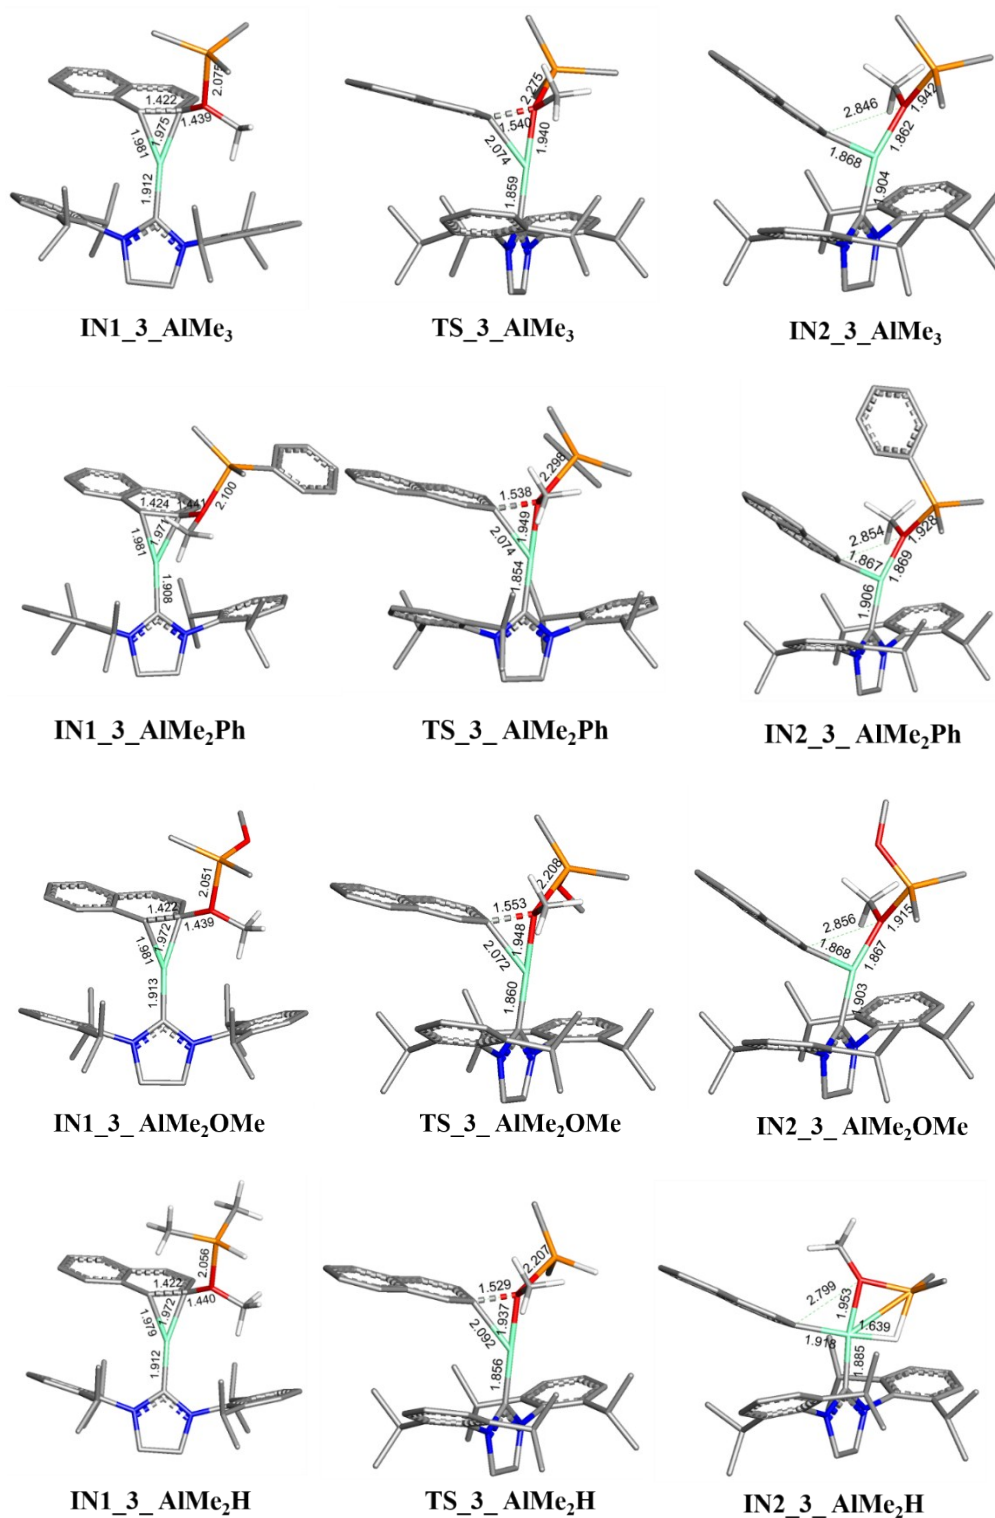

**Fig. S7** Optimized structures of IN1\_3\_LA, TS\_3\_LA, and IN2\_3\_LA (LA = AlMe<sub>2</sub>R; R = Me, Ph, OMe, and H) for aryl C-O oxidative addition of NaphOMe with assistance of AlMe<sub>3</sub>, AlMe<sub>2</sub>Ph, AlMe<sub>2</sub>OMe, and AlMe<sub>2</sub>H. Hydrogen atoms are omitted for clarity except for those on OMe and H of AlMe<sub>2</sub>H. Bond distances are shown in Å.

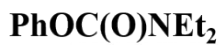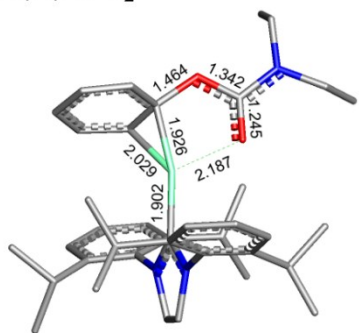

**IN1\_5**

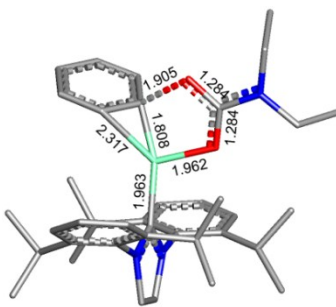

**TS\_5**

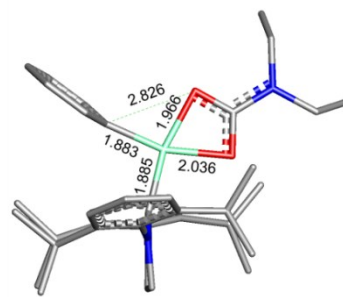

**IN2\_5**

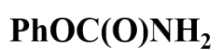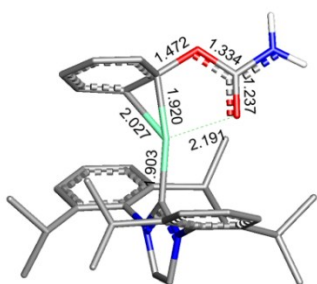

**IN1\_5**

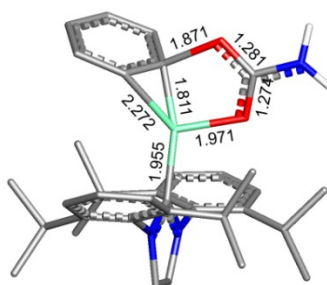

**TS\_5**

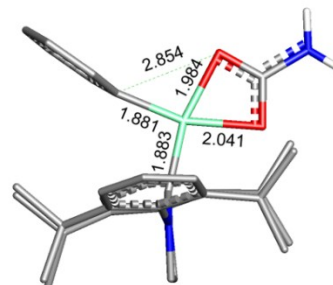

**IN2\_5**

**Fig. S8** Optimized structures of **IN1\_5**, **TS\_5**, and **IN2\_5** for aryl C-O oxidative addition of phenyl carbamates: PhOC(O)R<sup>2</sup> (R<sup>2</sup> = NEt<sub>2</sub>, and NH<sub>2</sub>). Hydrogen atoms are omitted for clarity except for those on NH<sub>2</sub>. Bond distances are shown in Å.

**PhOC(O)<sup>t</sup>Bu**

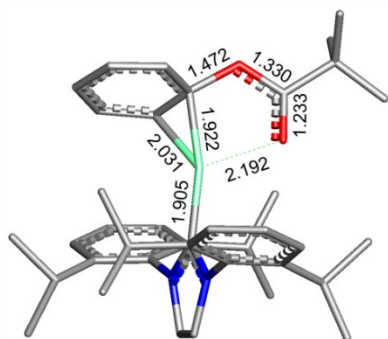

**IN1\_5**

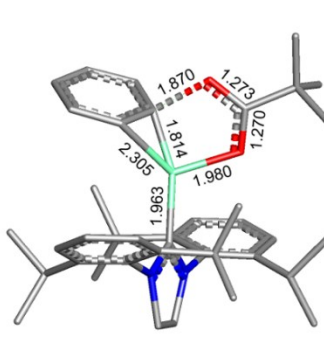

**TS\_5**

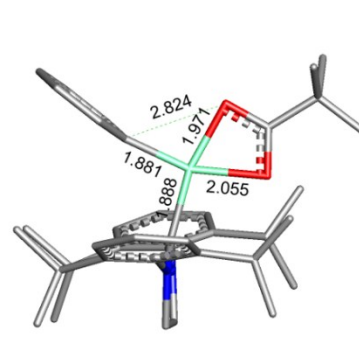

**IN2\_5**

**PhOC(O)Me**

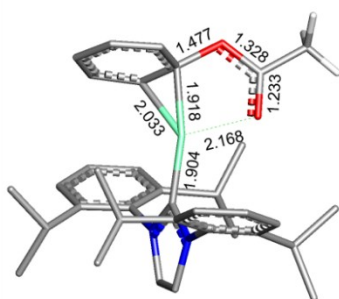

**IN1\_5**

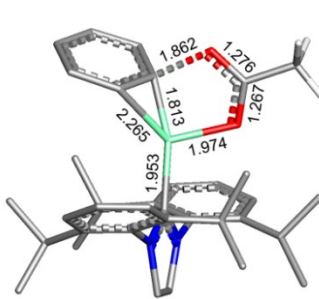

**TS\_5**

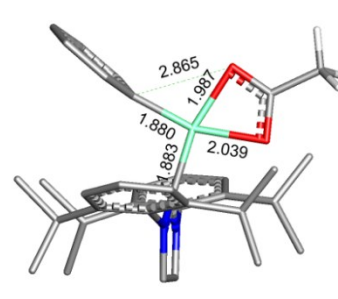

**IN2\_5**

**PhOC(O)Ph**

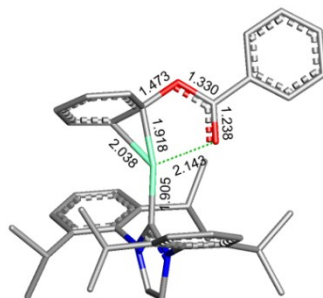

**IN1\_5**

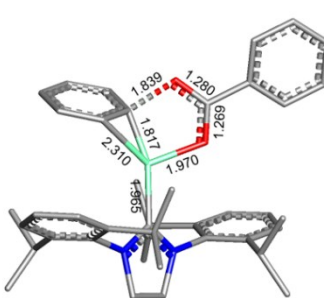

**TS\_5**

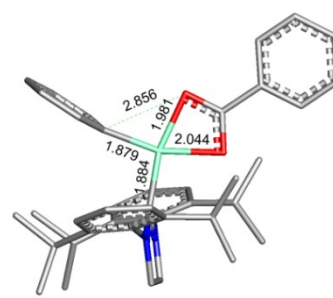

**IN2\_5**

**Fig. S9** Optimized structures of **IN1\_5**, **TS\_5**, and **IN2\_5** for aryl C-O oxidative addition of phenyl esters: PhOC(O)R<sup>2</sup> (R<sup>2</sup> = <sup>t</sup>Bu, Me, and Ph). Hydrogen atoms are omitted for clarity except for those on Me of PhOC(O)Me. Bond distances are shown in Å.

PhOS(O)<sub>2</sub>Me

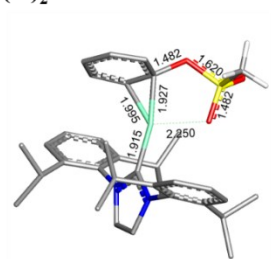

IN1\_5

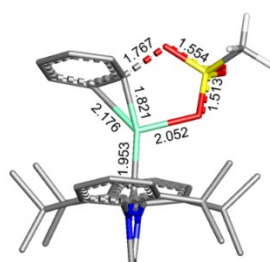

TS\_5

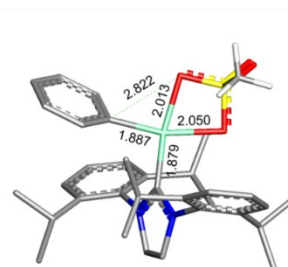

IN2\_5

PhOS(O)<sub>2</sub>(*p*-Tol)

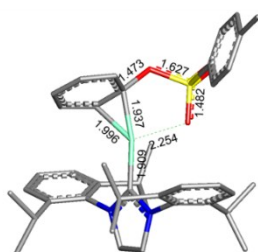

IN1\_5

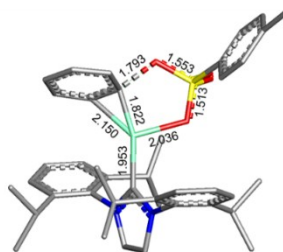

TS\_5

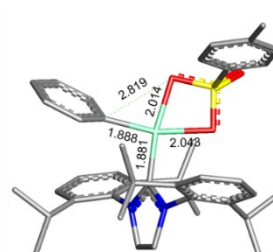

IN2\_5

PhOS(O)<sub>2</sub>CF<sub>3</sub>

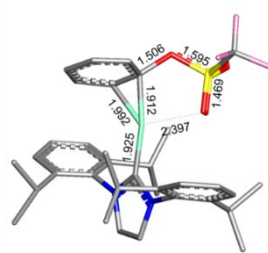

IN1\_5

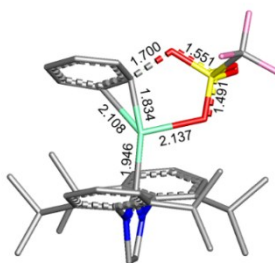

TS\_5

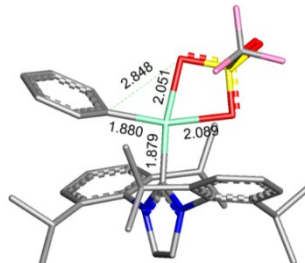

IN2\_5

**Fig. S10** Optimized structures of IN1\_5, TS\_5, and IN2\_5 for aryl C-O oxidative addition of phenyl sulfonates/sulfamate: PhOS(O)<sub>2</sub>R<sup>3</sup> (R<sup>3</sup> = Me, *p*-Tol, and CF<sub>3</sub>). Hydrogen atoms are omitted for clarity except for those on Me of PhOS(O)<sub>2</sub>Me. Bond distances are shown in Å.



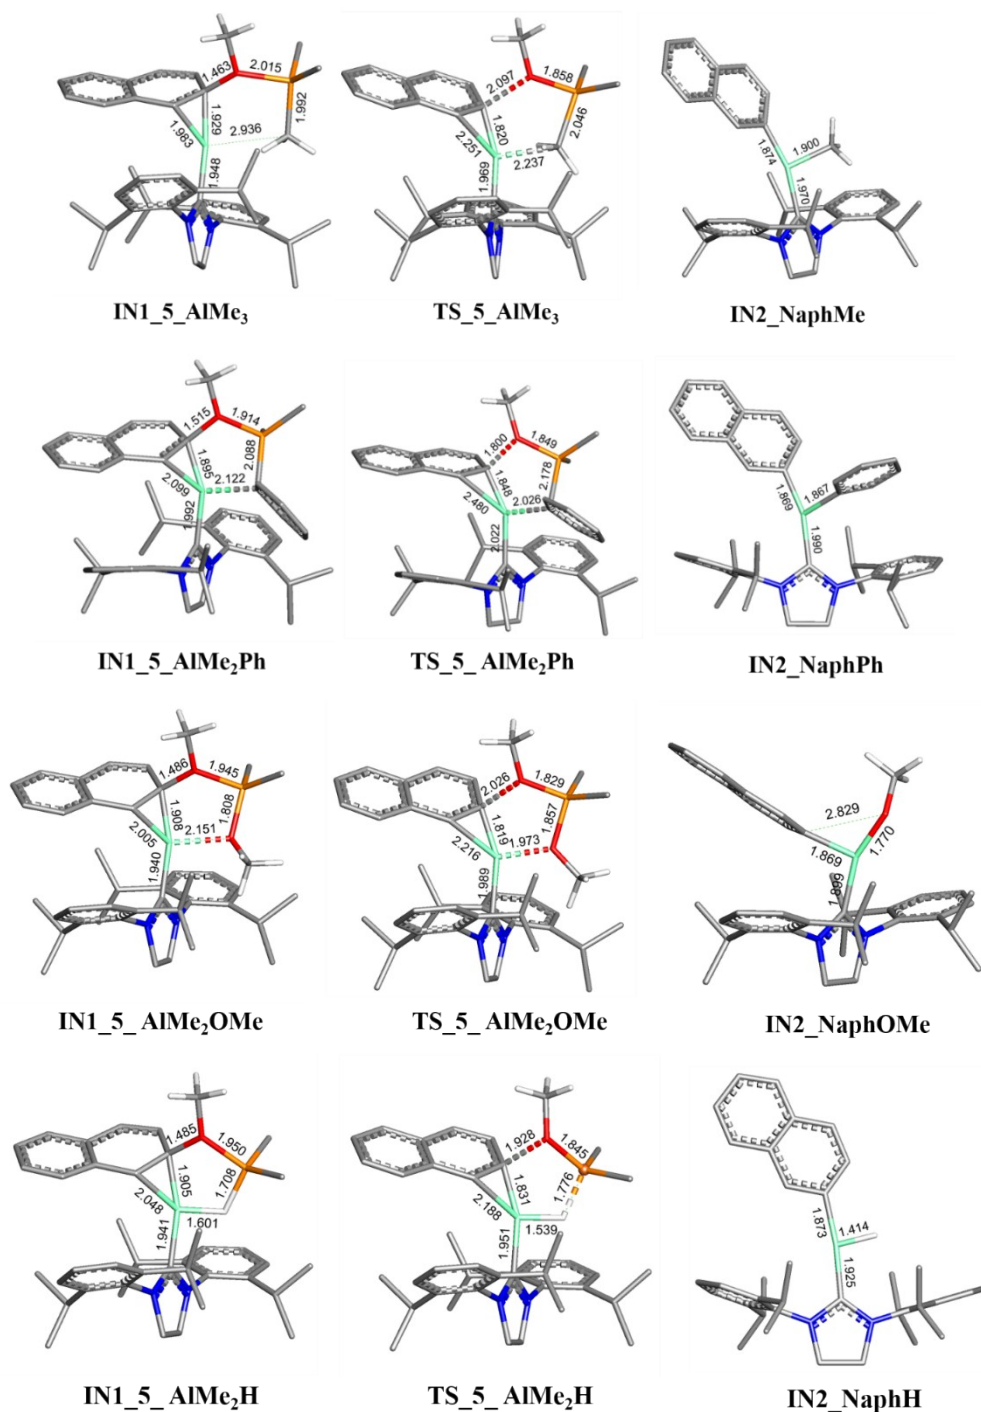

**Fig. S11** Optimized structures of **IN1\_5\_LA**, **TS\_5\_LA**, and **IN2\_NaphR** (LA = AlMe<sub>2</sub>R; R = Me, Ph, OMe, and H) for aryl C-O oxidative addition of NaphOMe with assistance of AlMe<sub>3</sub>, AlMe<sub>2</sub>Ph, AlMe<sub>2</sub>OMe, and AlMe<sub>2</sub>H. Hydrogen atoms are omitted for clarity except for migrating Me, H and OMe of AlMe<sub>2</sub>R and OMe of NaphOMe. Bond distances are shown in Å.

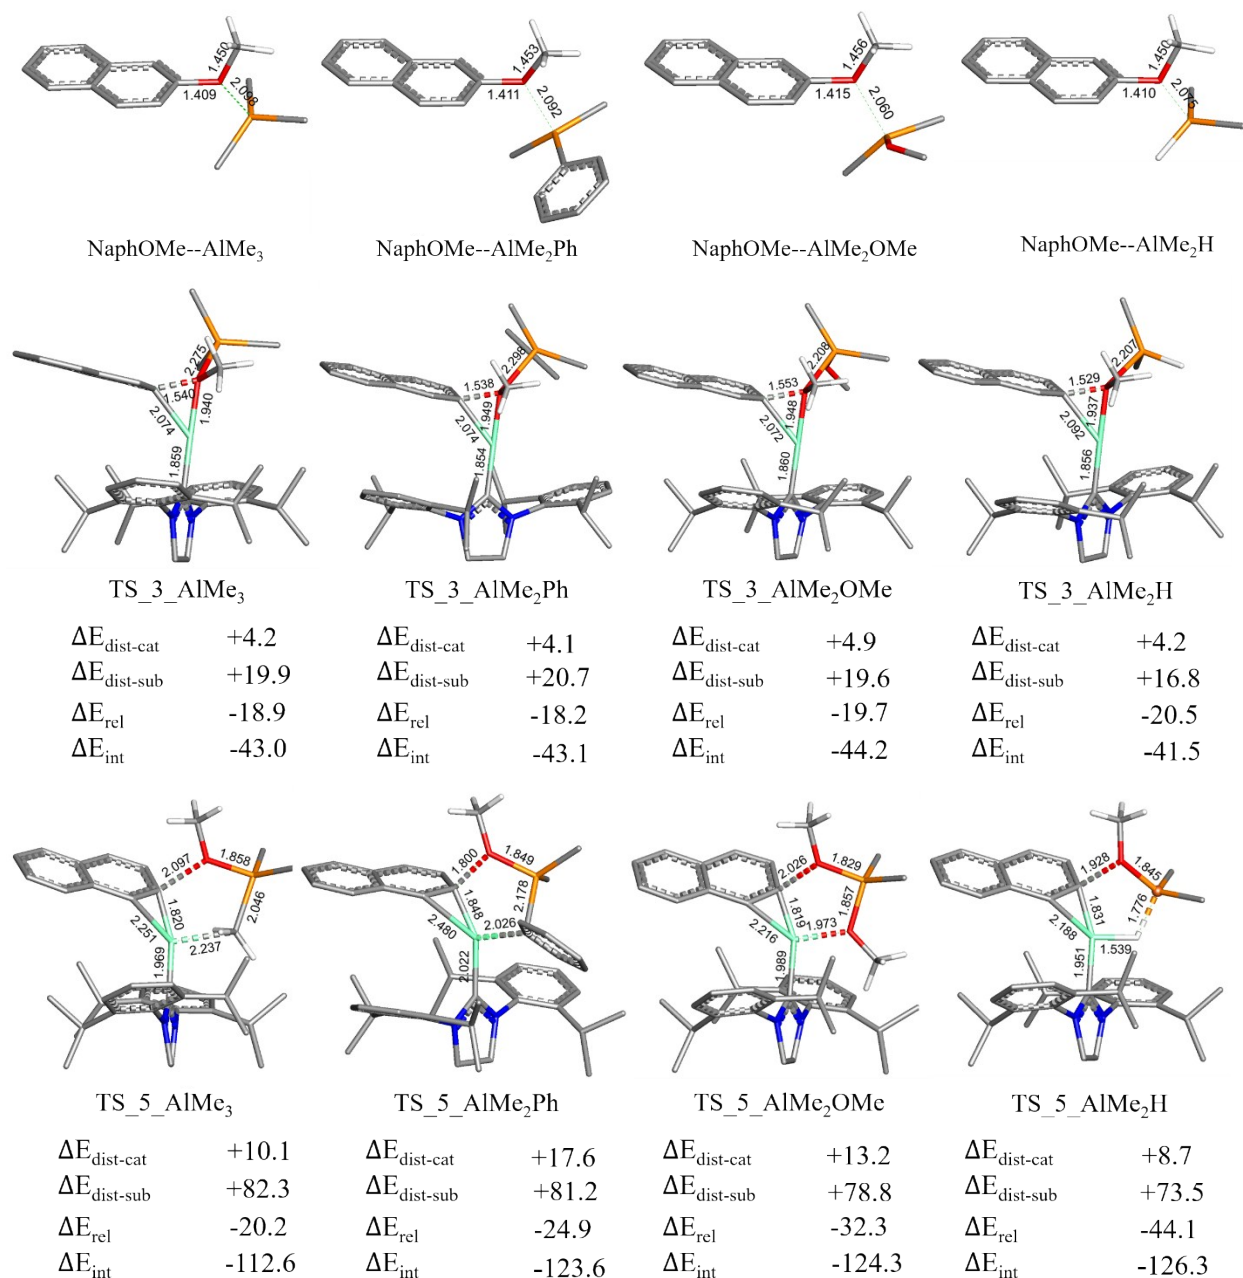

**Fig. S12** Optimized geometries and distortion-interaction decomposition energies (in kcal/mol) of three-centered transition state (TS<sub>3</sub>\_LA) and five-centered transition state (TS<sub>5</sub>\_LA) (LA = AlMe<sub>2</sub>R; R = Me, Ph, OMe, and H) for aryl C-O oxidative addition of NaphOMe assisted by AlMe<sub>2</sub>R Lewis acid (LA). Calculated bond distances are shown in Å. All hydrogen atoms are omitted for clarity except for those on migrating Me, H and OMe of AlMe<sub>2</sub>R and OMe of NaphOMe. Ni is shown in green, N in blue, C in grey, O in red, and H in white.

**NaphOMe (B3LYP/BS1)**

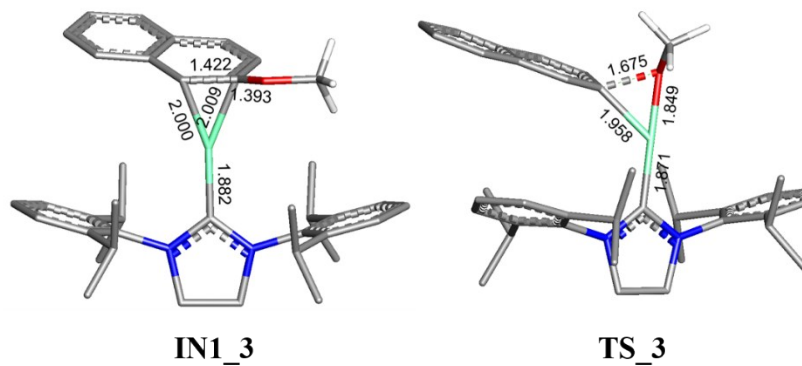

**NaphOMe (CPCM-B3LYP/BS1)**

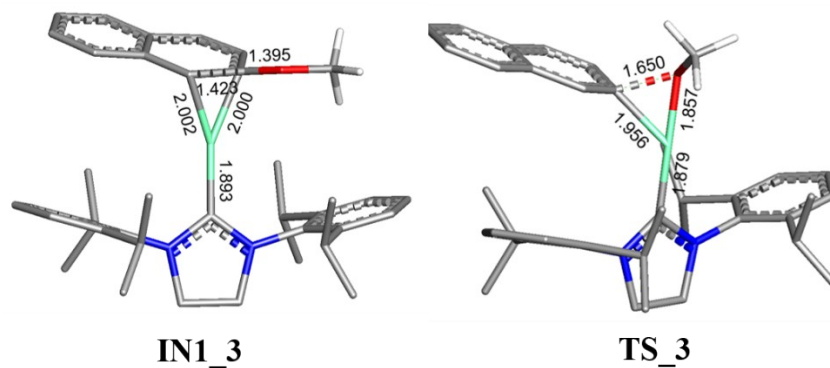

**Fig. S13** Optimized structures of **IN1\_3** and **TS\_3** for aryl C-O oxidative addition of NaphOMe using B3LYP/BS1 in gas phase and in solution phase.



**NaphOMe (B3LYP/BS1)**

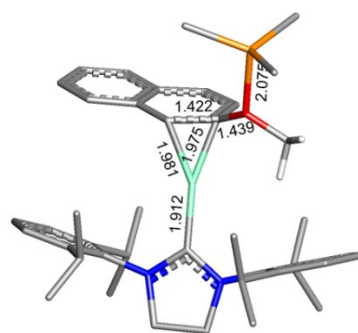

**IN1\_3\_AlMe<sub>3</sub>**

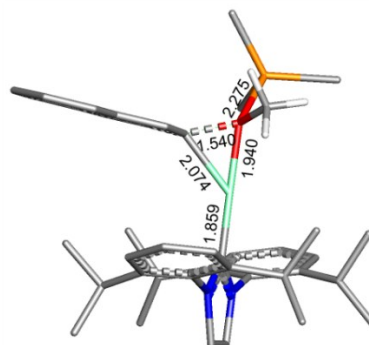

**TS\_3\_AlMe<sub>3</sub>**

**NaphOMe (CPCM-B3LYP/BS1)**

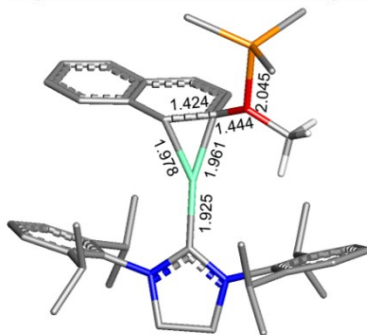

**IN1\_3\_AlMe<sub>3</sub>**

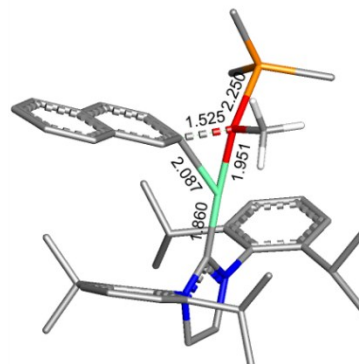

**TS\_3\_AlMe<sub>3</sub>**

**Fig. S14** Optimized structures of IN1\_3\_AlMe<sub>3</sub> and TS\_3\_AlMe<sub>3</sub> for aryl C-O oxidative addition of NaphOMe with assistance of AlMe<sub>3</sub> using B3LYP/BS1 in gas phase and in solution phase.

**NaphOMe (B3LYP/BS1)**

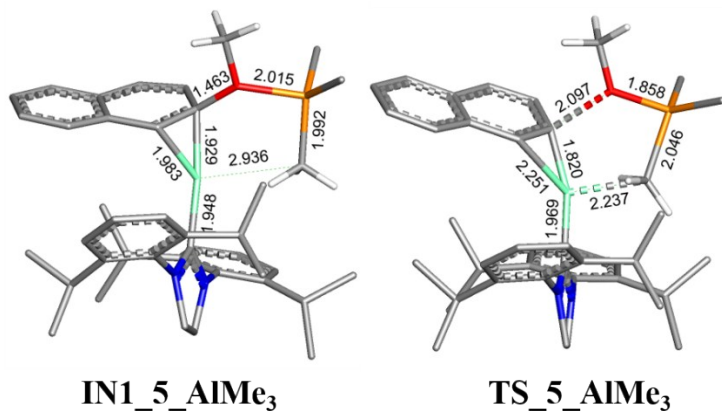

**NaphOMe (CPCM-B3LYP/BS1)**

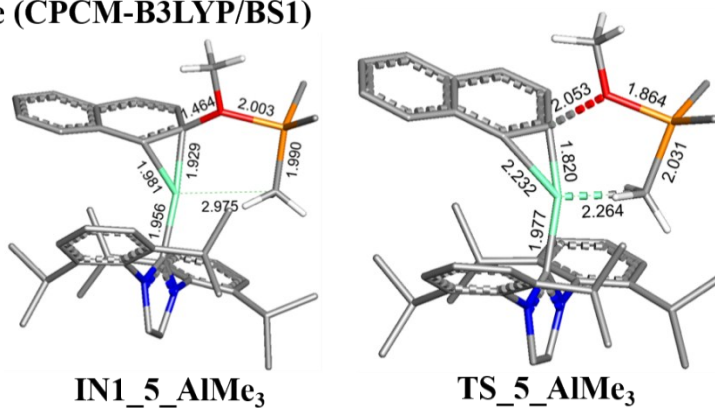

**Fig. S15** Optimized structures of IN1\_5\_AlMe<sub>3</sub> and TS\_5\_AlMe<sub>3</sub> for aryl C-O oxidative addition of NaphOMe with assistance of AlMe<sub>3</sub> using B3LYP/BS1 in gas phase and in solution phase.

NaphOMe (B3LYP/BS1)

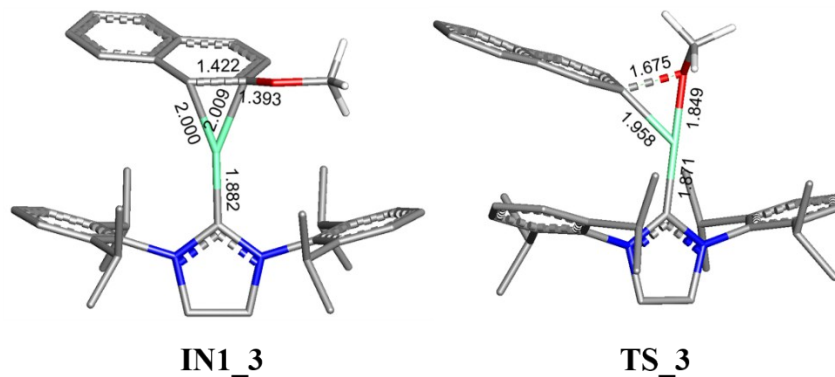

NaphOMe (wB97XD/BS1)

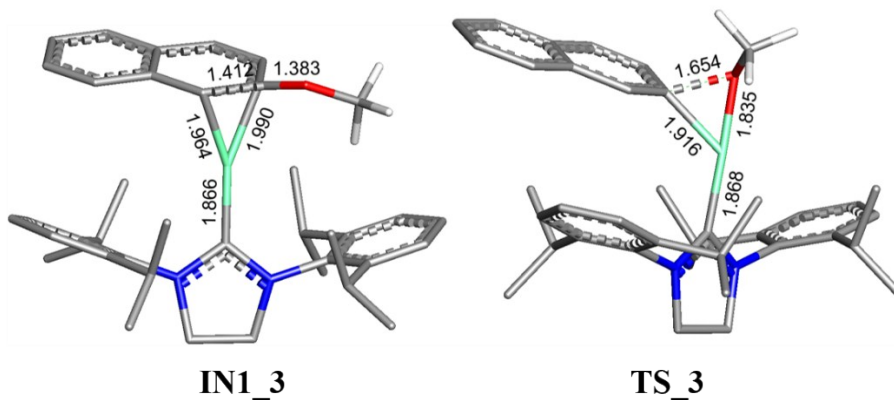

NaphOMe (M06L/BS1)

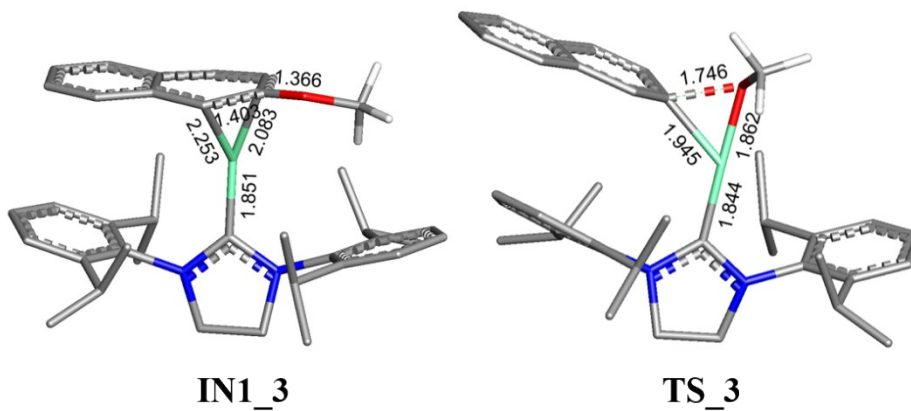

**Fig. S16** Optimized structures of IN1\_3 and TS\_3 for aryl C-O oxidative addition of NaphOMe using B3LYP, wB97XD, and M06L.

NaphOMe (B3LYP/BS1)

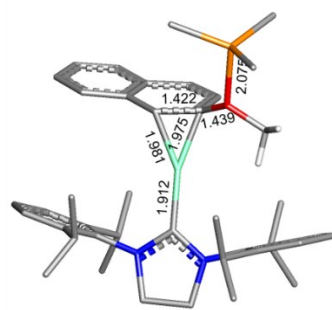

IN1\_3\_AlMe<sub>3</sub>

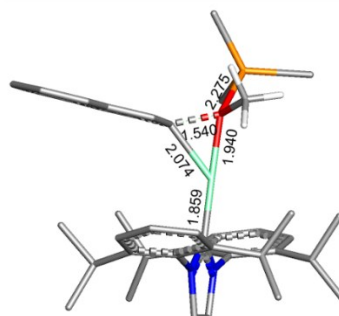

TS\_3\_AlMe<sub>3</sub>

NaphOMe (wB97XD/BS1)

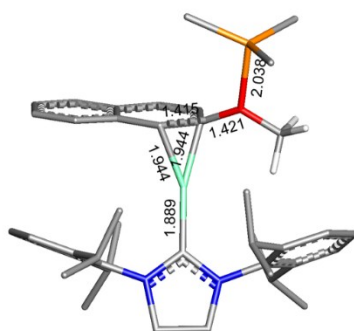

IN1\_3\_AlMe<sub>3</sub>

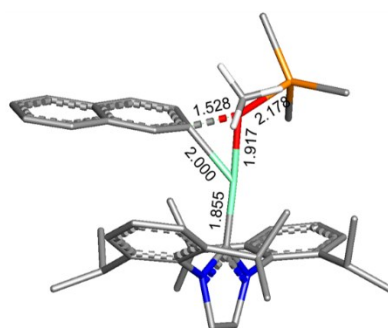

TS\_3\_AlMe<sub>3</sub>

NaphOMe (M06L/BS1)

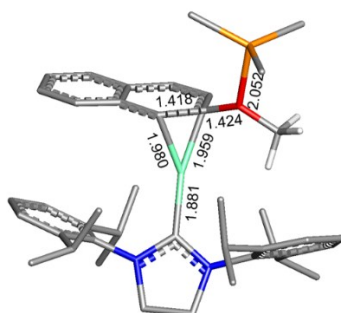

IN1\_3\_AlMe<sub>3</sub>

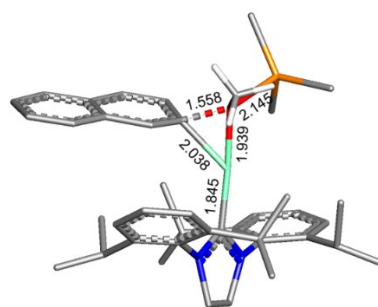

TS\_3\_AlMe<sub>3</sub>

**Fig. S17** Optimized structures of IN1\_3\_AlMe<sub>3</sub> and TS\_3\_AlMe<sub>3</sub> for aryl C-O oxidative addition of NaphOMe with assistance of AlMe<sub>3</sub> using B3LYP, wB97XD, and M06L.

NaphOMe (B3LYP/BS1)

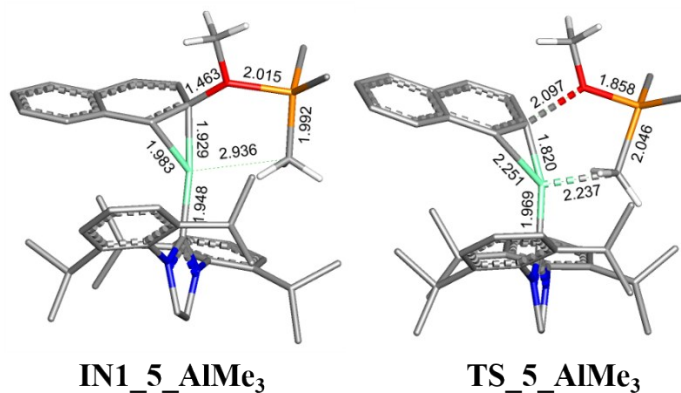

NaphOMe (wB97XD/BS1)

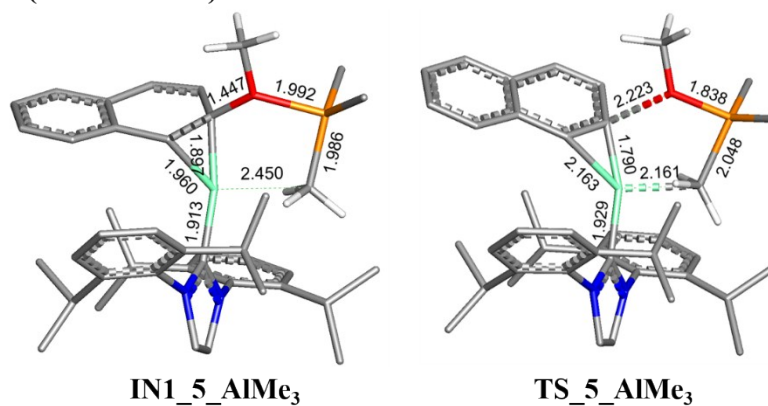

NaphOMe (M06L/BS1)

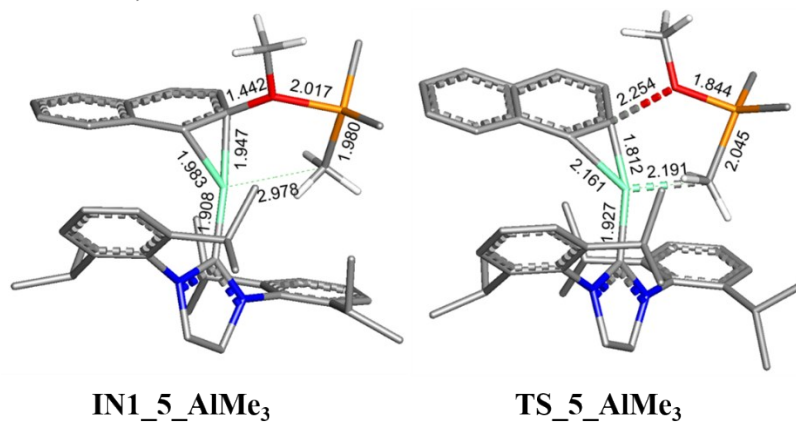

**Fig. S18** Optimized structures of IN1\_3\_AlMe<sub>3</sub> and TS\_3\_AlMe<sub>3</sub> for aryl C-O oxidative addition of NaphOMe with assistance of AlMe<sub>3</sub> using B3LYP, wB97XD, and M06L.

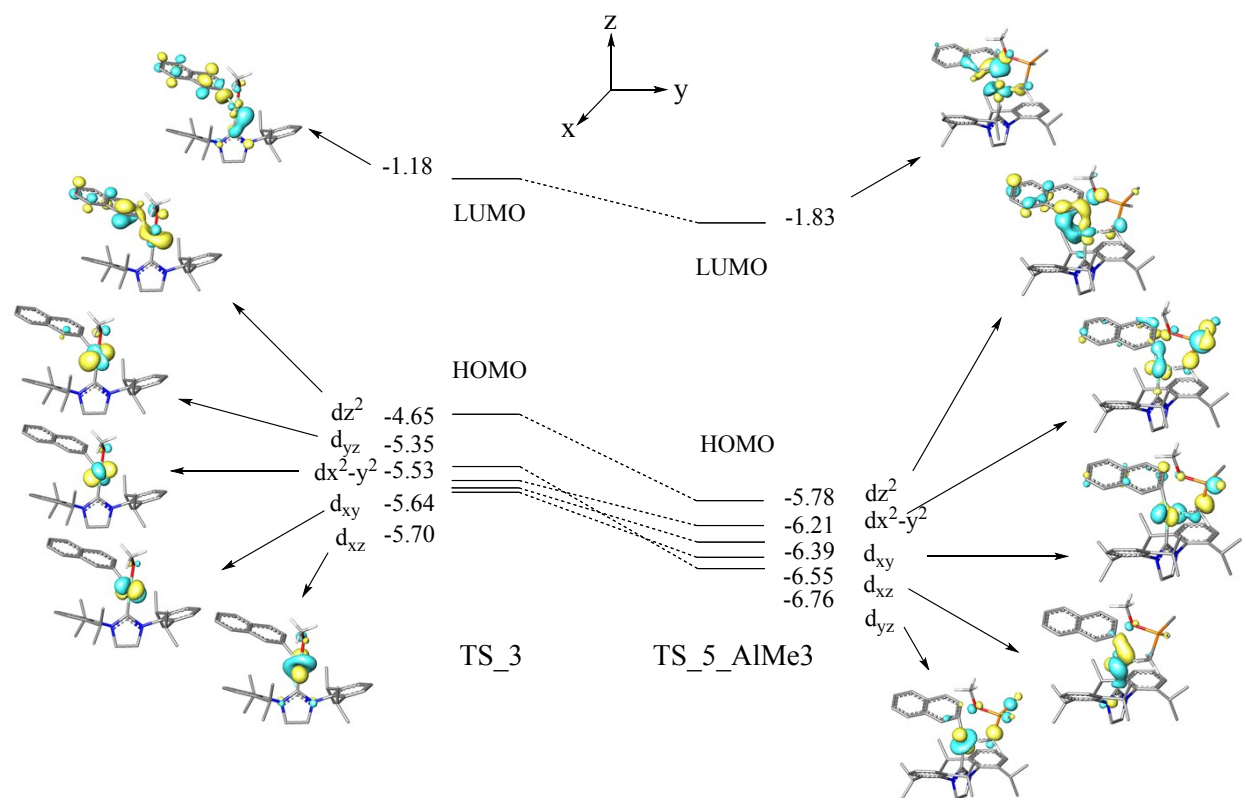

**Fig. S19** Selected molecular orbitals and energies of molecular orbitals (in eV) of TS\_3 and TS\_5\_AlMe<sub>3</sub> for NaphOMe.

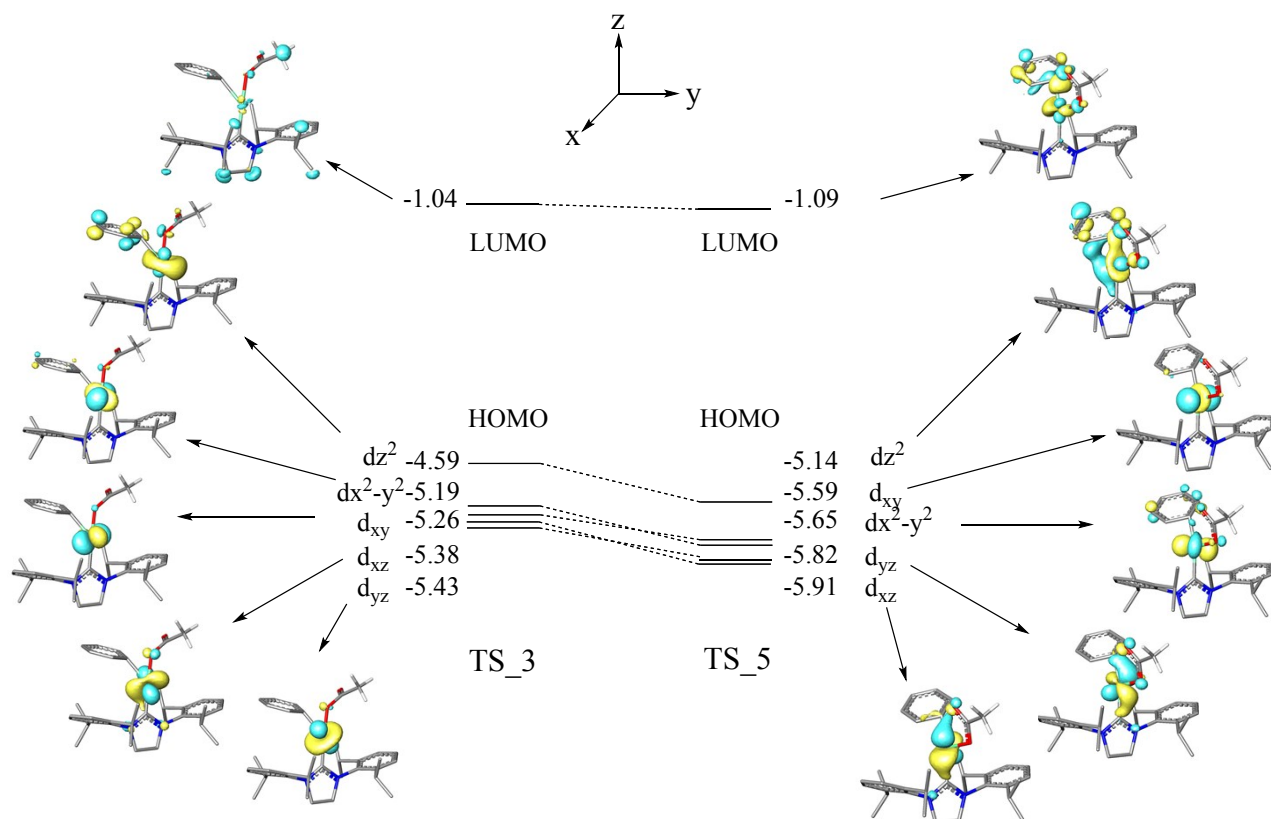

**Fig. S20** Selected molecular orbitals (MOs) and MO energies (in eV) of TS<sub>3</sub> and TS<sub>5</sub> for PhOC(O)Me.

## References

1. X. Hong, Y. Liang and K. N. Houk, *J. Am. Chem. Soc.*, 2014, **136**, 2017-2025.
2. D. H. Ess and K. N. Houk, *J. Am. Chem. Soc.*, 2007, **129**, 10646-10647.
3. F. Israel and B. F. Matthias, *J. Comput. Chem.*, 2012, **33**, 509-516.
4. F. M. Bickelhaupt and K. N. Houk, *Angew. Chem., Int. Ed.*, 2017, **56**, 10070-10086.
5. I. Fernandez and F. M. Bickelhaupt, *Chem. Soc. Rev.*, 2014, **43**, 4953-4967.
6. K. Morokuma, *J. Chem. Phys.*, 1971, **55**, 1236-1244.
7. K. Kitaura and K. Morokuma, *Int. J. Quantum Chem.*, 1976, **10**, 325-340.
